# Supplementary material
Source: bioRxiv or medRxiv preprint supplement (https://medrxiv.org/highwire/filestream/93114/field_highwire_adjunct_files/6/2020.08.11.20172809-7.pdf)
Supplement: Supplementary file [file 2020.08.11.20172809-7.pdf]

Supplementary Table 4: Final Model Hyper-Parameters.

| Hyper-Parameter         | LASSO Models | MLP Models                                                                                              |
|-------------------------|--------------|---------------------------------------------------------------------------------------------------------|
| Penalty                 | L1           | ---                                                                                                     |
| C-value                 | 0.1          | ---                                                                                                     |
| Hidden Layers and Units | ---          | Hidden Layer 1: 40 units<br>Hidden Layer 2: 10 units<br>Hidden Layer 3: 2 units<br>Output Layer: 1 unit |
| Activation Function     | ---          | Rectified Linear Unit (ReLU)                                                                            |
| Optimization Function   | ---          | Adam                                                                                                    |
| Loss Function           | ---          | Logarithmic Softmax                                                                                     |
| Dropout                 | ---          | None                                                                                                    |
| Batch Size              | ---          | 32                                                                                                      |
| Learning Rate           | ---          | 0.001                                                                                                   |
| Epochs per Round        | ---          | 80                                                                                                      |
